# Supplementary material
Source: publisher figshare collection journal article supplement (https://acs.figshare.com/ndownloader/files/9678079)
Supplement: Supplementary file 1 [file 9678079]

## Supporting Information

### Experimental evaluation of turbidity impact on the fluence rate distribution in a UV reactor using a micro-fluorescent silica detector

Mengkai Li <sup>†,‡</sup>, Wentao Li <sup>‡</sup>, Dong Wen <sup>‡</sup>, Zhimin Qiang <sup>‡,\*</sup>,

Ernest R. Blatchley III <sup>†,§,\*</sup>

<sup>†</sup> *Lyles School of Civil Engineering, Purdue University, West Lafayette, Indiana 47907, United States;*

<sup>‡</sup> *Laboratory of Drinking Water Science and Technology, Research Center for Eco-Environmental Sciences, University of Chinese Academy of Sciences, Chinese Academy of Sciences, 18 Shuang-qing Road, Beijing 100085, China;*

<sup>§</sup> *Division of Environmental & Ecological Engineering, Purdue University, West Lafayette, Indiana 47907, United States.*

\*Corresponding author: ph. 1-765-494-0316; fax 1-765-494-0395; email

[blatch@purdue.edu](mailto:blatch@purdue.edu); Lyles School of Civil Engineering, Purdue University, 550

Stadium Mall Drive, West Lafayette, IN 47907 USA.

**Table S1.** FR values at a distance of 70 cm from the sleeve surface in the central cross-section of the reactor.

| Suspension       | FR (mW cm <sup>-2</sup> ) |       |        |        |
|------------------|---------------------------|-------|--------|--------|
|                  | 0                         | 2 NTU | 10 NTU | 20 NTU |
| DI water         | 3.79                      |       |        |        |
| SiO <sub>2</sub> |                           | 3.86  | 4.23   | 4.89   |
| MgO              |                           | 3.86  | 4.11   | 4.25   |
| TiO <sub>2</sub> |                           | 4.01  | 2.66   | 1.95   |

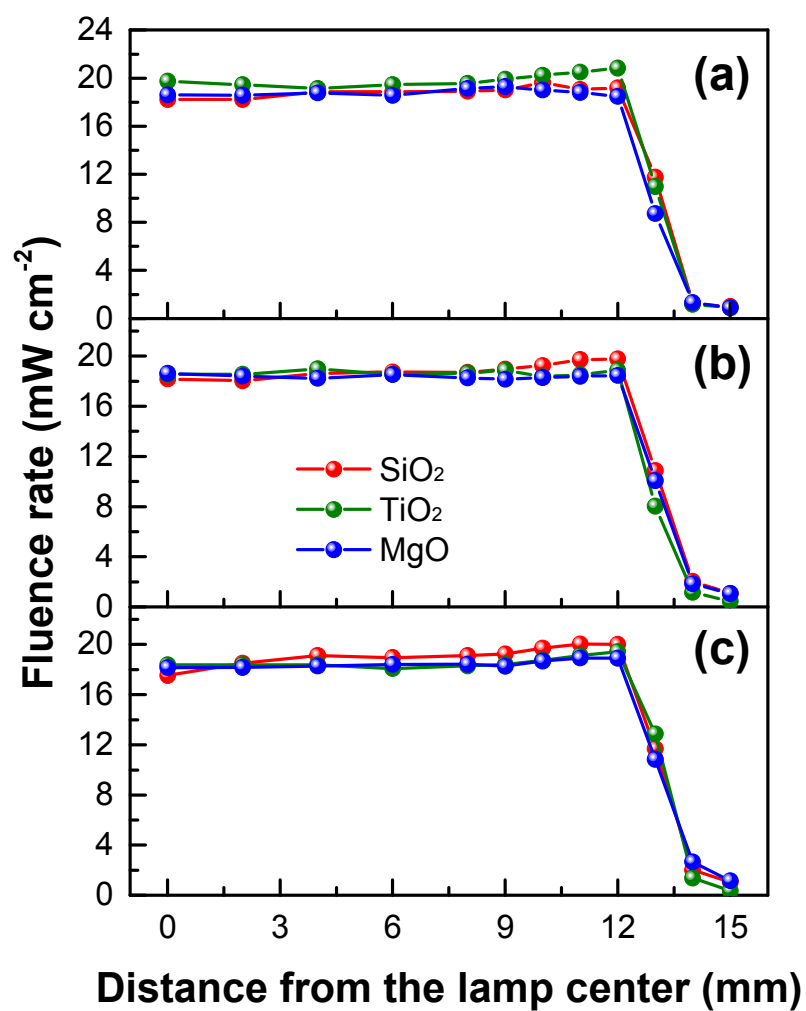

**Figure S1.** Axial FR distributions in the near-lamp region (5 mm from the sleeve surface) for various particle suspensions with turbidities of (a) 2.0 NTU, (b) 10.0 NTU, and (c) 20.0 NTU.

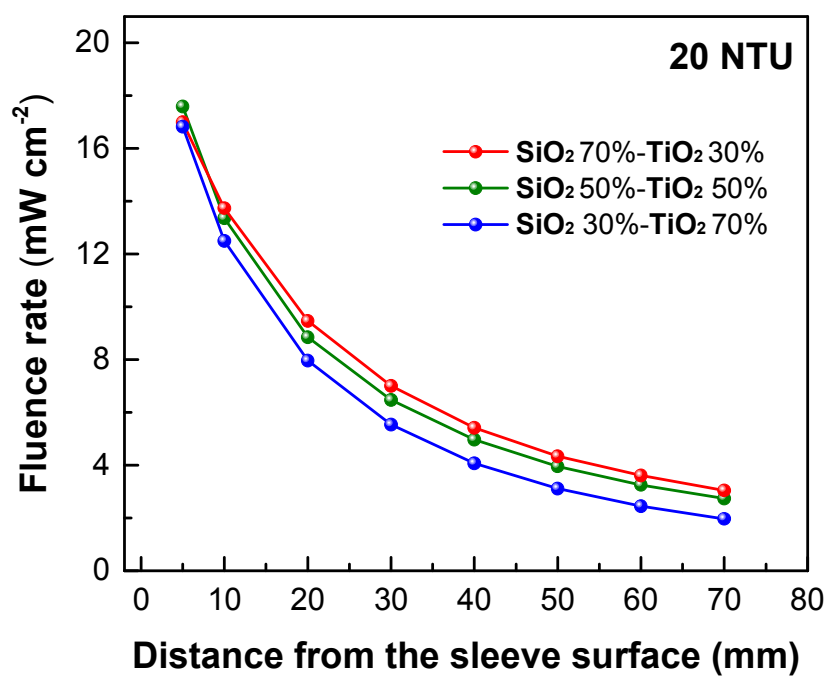

**Figure S2.** Radial FR distributions with mixed particle suspensions with turbidity of 20.0 NTU.
